$C_{\text{trough}}$  decreased 22%, 11% and 38%, respectively.<sup>5</sup> This decrease in dolutegravir parameters in healthy volunteers was not considered to be clinically relevant by the authors. Our study confirmed this hypothesis and demonstrated adequate plasma concentrations following the once-daily dosing of 800/100mg darunavir/ritonavir plus 50mg dolutegravir. No significant change in liver, renal or haematological function was reported.

## Acknowledgements

We would like to thank Ms Helen Bidner and the team of Münchner Studienzentrum (MSZ) as well as Ms Anna-Maria Balogh and the staff of MUC Research for extending their support to carry out this study. We thank Ms Anne Elter and Ms Diana Schirmer for their technical assistance. We also thank the study centres and participants of the DUALIS study.

## Funding

This study was funded by Technische Universität München and supported with a research grant from Janssen-Cilag and Viiv Healthcare.

## Transparency declarations

All authors declare honoraria for advisory boards, reimbursement of travel costs and delivery of lectures from Janssen-Cilag and Viiv Healthcare.

## References

- 1 May M, Gompels M, Sabin C. Life expectancy of HIV-1-positive individuals approaches normal conditional on response to antiretroviral therapy: UK Collaborative HIV Cohort Study. *J Intl AIDS Soc* 2012; **15** Suppl 4: 18078.
- 2 Lee FJ, Amin J, Carr A. Efficacy of initial antiretroviral therapy for HIV-1 infection in adults: a systematic review and meta-analysis of 114 studies with up to 144 weeks' follow-up. *PLoS One* 2014; **9**: e97482.
- 3 Shah BM, Schafer JJ, Desimone JA. Dolutegravir: a new integrase strand transfer inhibitor for the treatment of HIV. *Pharmacotherapy* 2014; **34**: 506–20.
- 4 Llibre JM, Imaz A, Clotet B. From TMC114 to darunavir: five years of data on efficacy. *AIDS Rev* 2013; **15**: 112–21.
- 5 Song I, Min SS, Borland J *et al.* The effect of lopinavir/ritonavir and darunavir/ritonavir on the HIV integrase inhibitor S/GSK1349572 in healthy participants. *J Clin Pharmacol* 2011; **51**: 237–42.
- 6 Hirano A, Takahashi M, Kinoshita E *et al.* High performance liquid chromatography using UV detection for the simultaneous quantification of the new non-nucleoside reverse transcriptase inhibitor etravirine (TMC-125), and 4 protease inhibitors in human plasma. *Biol Pharm Bull* 2010; **33**: 1426–9.
- 7 Charbe N, Baldelli S, Cozzi V *et al.* Development of an HPLC–UV assay method for the simultaneous quantification of nine antiretroviral agents in the plasma of HIV-infected patients. *J Pharm Anal* 2016; **6**: 396–403.
- 8 Cottrell ML, Hadzic T, Kashuba ADM. Clinical pharmacokinetic, pharmacodynamic and drug-interaction profile of the integrase inhibitor dolutegravir. *Clin Pharmacokinet* 2013; **52**: 981–94.

9 *Prezista Product Information*. [http://www.janssen.com/australia/australia/sites/www\\_janssen\\_com\\_australia/files/product/pdf/prezista\\_pi.pdf](http://www.janssen.com/australia/australia/sites/www_janssen_com_australia/files/product/pdf/prezista_pi.pdf).

*J Antimicrob Chemother* 2017; **72**: 2681–2683

doi:10.1093/jac/dkx166

Advance Access publication 5 June 2017

## High decay of blood HIV reservoir when tenofovir/emtricitabine/elvitegravir/cobicistat is initiated during the acute primary HIV infection

Elisabeth Carolle Ngo Bell<sup>1</sup>, Marie-Anne Vandenhende<sup>1</sup>, Sabrina Caldato<sup>1</sup>, Aurélie Saunier<sup>1</sup>, Pantxika Bellecave<sup>2</sup>, Camille Tumiottto<sup>2</sup>, Véronique Avettand-Fenoel<sup>3,4</sup>, Mojgan Hessamfar<sup>1</sup>, Philippe Morlat<sup>1</sup> and Fabrice Bonnet<sup>1\*</sup>

<sup>1</sup>CHU de Bordeaux, Service de Médecine Interne et Maladies Infectieuses, Hôpital Saint André, 33000 Bordeaux, France; <sup>2</sup>CHU de Bordeaux, Laboratoire de Virologie, Hôpital Pellegrin, 33000 Bordeaux, France; <sup>3</sup>APHP Hôpital Necker-Enfants Malades, Laboratoire de Virologie, Paris, France; <sup>4</sup>Université Paris-Descartes Sorbonne Paris Cité, Faculté de Médecine, EA 7327, Paris, France

\*Corresponding author. Tel: +33-556-795-823; Fax: +33-556-795-822; E-mail: fabrice.bonnet@chu-bordeaux.fr

Sir,

Early treatment during primary HIV infection (PHI) brings benefits by reducing the circulating viral load and the size of the reservoirs.<sup>1</sup> The French guidelines<sup>2</sup> propose to treat PHI with a triple antiretroviral combination including two NRTIs plus a third agent: an integrase strand transfer inhibitor (INSTI) or a PI. Among INSTIs, dolutegravir was chosen because of its bioavailability, virological power, genetic barrier and limited drug interactions although there is no clinical trial evaluating it in this context.

The use of the combined form of abacavir/lamivudine/dolutegravir to treat PHI is limited due to the need for human leucocyte antigen (HLA) typing to exclude the abacavir sensitivity conferred by HLA B\*57:01. Data on the use of tenofovir/emtricitabine/elvitegravir/cobicistat in this indication are also limited. This elvitegravir combination presents the advantage of a single tablet without risk of hypersensitivity and the cobicistat pharmacokinetic boost allows rapid acquisition of elvitegravir plasma levels compatible with optimal virological efficacy.

**Table 1.** Viro-immunological characteristics of PHI patients treated with tenofovir/emtricitabine/elvitegravir/cobicistat

| Patient | Age (years) | Sex  | Delay of treatment (days) | Origin | Fiebig stage | Length of treatment (months) | HIV RNA copies/mL | HIV DNA copies/10 <sup>6</sup> PBMCs | CD4 cells/mm <sup>3</sup> |
|---------|-------------|------|---------------------------|--------|--------------|------------------------------|-------------------|--------------------------------------|---------------------------|
| 1       | 47          | male | 4                         | France | 2            | D0                           | 1543000           | 270                                  | 500                       |
|         |             |      |                           |        |              | M1                           | 46                | 59                                   | 1144                      |
|         |             |      |                           |        |              | M2                           | <40               | 37                                   | 1129                      |
|         |             |      |                           |        |              | M4                           | <40               | <8                                   | 1012                      |
|         |             |      |                           |        |              | M6                           | <40               | 27                                   | NA                        |
|         |             |      |                           |        |              | M12                          | <20               | 17                                   | 1317                      |
|         |             |      |                           |        |              | M18                          | <20               | <8                                   | 1183                      |
| 2       | 39          | male | NA                        | France | 2            | D0                           | 10000000          | NA                                   | 177                       |
|         |             |      |                           |        |              | M2                           | 74                | 264                                  | 395                       |
|         |             |      |                           |        |              | M4                           | <20               | 107                                  | NA                        |
|         |             |      |                           |        |              | M8                           | 24                | 90                                   | NA                        |
|         |             |      |                           |        |              | M12                          | 36                | 155                                  | 380                       |
|         |             |      |                           |        |              | M18                          | <20               | 8                                    | 561                       |
|         |             |      |                           |        |              | M18                          | <20               | 8                                    | 561                       |
| 3       | 43          | male | 28                        | France | 4            | D0                           | 86053             | NA                                   | 532                       |
|         |             |      |                           |        |              | M1                           | <40               | 129                                  | 662                       |
|         |             |      |                           |        |              | M4                           | <20               | 109                                  | 1484                      |
|         |             |      |                           |        |              | M8                           | <20               | <70                                  | NA                        |
|         |             |      |                           |        |              | M12                          | 69                | 182                                  | 991                       |
|         |             |      |                           |        |              | M18                          | <20               | 63                                   | 1104                      |
|         |             |      |                           |        |              | M18                          | <20               | 63                                   | 1104                      |
| 4       | 34          | male | 4                         | France | 2            | D0                           | 10000000          | NA                                   | 278                       |
|         |             |      |                           |        |              | M1                           | 51                | 9                                    | NA                        |
|         |             |      |                           |        |              | M3                           | 43                | 43                                   | NA                        |
|         |             |      |                           |        |              | M7                           | <20               | 191                                  | 762                       |
|         |             |      |                           |        |              | M12                          | <20               | 210                                  | 683                       |
|         |             |      |                           |        |              | M18                          | <20               | <8                                   | 635                       |
|         |             |      |                           |        |              | M18                          | <20               | <8                                   | 635                       |
| 5       | 27          | male | NA                        | France | 2            | D0                           | 8469000           | 9386                                 | 297                       |
|         |             |      |                           |        |              | M1                           | 221               | 373                                  | 658                       |
|         |             |      |                           |        |              | M3                           | 0                 | 82                                   | 851                       |
|         |             |      |                           |        |              | M7                           | 0                 | 286                                  | 799                       |
|         |             |      |                           |        |              | M12                          | 29                | 34                                   | 937                       |
|         |             |      |                           |        |              | M18                          | 34                | 137                                  | 619                       |
|         |             |      |                           |        |              | M18                          | 34                | 137                                  | 619                       |
| 6       | 52          | male | 5                         | France | 3            | D0                           | 9740000           | 6947                                 | 413                       |
|         |             |      |                           |        |              | M1                           | <20               | <8                                   | 586                       |
|         |             |      |                           |        |              | M3                           | <20               | 74                                   | 618                       |
|         |             |      |                           |        |              | M6                           | <20               | NA                                   | 517                       |
|         |             |      |                           |        |              | M12                          | <20               | <8                                   | 526                       |
|         |             |      |                           |        |              | M12                          | <20               | <8                                   | 526                       |
|         |             |      |                           |        |              | M12                          | <20               | <8                                   | 526                       |

D0, day 0, M, month; NA, not available.

We report a case series of patients with PHI treated with tenofovir/emtricitabine/elvitegravir/cobicistat; we monitored blood total HIV DNA load, a biomarker estimating the viral reservoir.<sup>3</sup>

Six patients were included from April 2014 to August 2015. The plasma HIV RNA load was initially measured by a real-time HIV-1 RT-PCR method (mp2000 Abbott<sup>®</sup>) with a detection limit of 40 HIV RNA copies/mL and then by a different method (Cobas 6800 Roche<sup>®</sup>) with a detection limit of 20 HIV RNA copies/mL. The level of total HIV DNA was quantified in whole blood cells by ultrasensitive real-time PCR targeting the long terminal repeat region using the ANRS consensus technique (Biocentric<sup>®</sup>, France).<sup>4</sup> Results are expressed as number of HIV-1 DNA copies/10<sup>6</sup> PBMCs, with a detection threshold of 8 copies/10<sup>6</sup> PBMCs. Follow-up was performed up to 18 months.

The six patients were MSM, with a median age of 41 years (range = 27–52). Four of them were Fiebig stage 2<sup>5</sup> and the two

other patients were Fiebig stage 3 and 4, respectively. At initiation of ART, the median HIV RNA was 6.95 log<sub>10</sub> (IQR = 6.18 log<sub>10</sub>–7 log<sub>10</sub>) with a median CD4 count of 355 cells/mm<sup>3</sup> (IQR = 278–500). The median level of HIV DNA was 3.84 log<sub>10</sub> copies/10<sup>6</sup> PBMCs (IQR = 2.73–3.97). The ART was started a median of 4.5 days (IQR = 4–16.5) after the diagnosis of the PHI. The status of optimal viro-immunological responder (OVIR) was defined as HIV RNA <50 copies/mL and HIV DNA <2.3 log<sub>10</sub> copies/10<sup>6</sup> PBMCs, as well as a normalization of immune reconstitution markers: absolute CD4+ T lymphocyte count >500 cells/mm<sup>3</sup>, percentage of CD4 T cells >30% and CD4+/CD8+ ratio >1.<sup>6</sup> Five patients obtained OVIR status after a median of 84 days (IQR = 28–336) of treatment. All patients had undetectable HIV RNA at a median of 75 days (IQR = 30–120). The median gain of CD4 at the 12th month was 432 cells/mm<sup>3</sup> (IQR = 203–640) and the median decrease in HIV

RNA at the 1st month was  $5.03 \log_{10}$  (IQR =  $4.58 \log_{10}$ – $5.3 \log_{10}$ ). Two patients reached undetectable blood HIV DNA before the 6th month, but had subsequently low levels of HIV DNA ( $1.43$  and  $1.23 \log_{10}$  copies/ $10^6$  PBMCs for one patient and  $1.86 \log_{10}$  copies/ $10^6$  PBMCs for the other patient). The clinical and viro-immunological characteristics of all six patients are summarized in Table 1.

The impact of early ART in PHI is now well validated given the clinical, virological, immunological and epidemiological benefits.<sup>7,8</sup> Only one study reported the use of tenofovir/emtricitabine/elvitegravir/cobicistat in PHI, with a gain of 350 CD4 cells at week 48 and a rapid decrease in viral load at week 4.<sup>9</sup> Our study confirms these results by showing an early and sustained virological response and provides additional data on the decrease in HIV DNA in PHI treated with tenofovir/emtricitabine/elvitegravir/cobicistat.

The OVIR status was obtained in five of six patients less than 120 days after ART initiation. This may reflect the correct diffusion in sanctuaries, although there are no data on the diffusion of INSTIs in the CNS and the digestive compartment.

The natural polymorphism of the integrase gene varies and minor mutations may affect the efficacy of INSTIs.<sup>10</sup> Thus, a prevalence around 1.5% of polymorphic INSTI mutations was described in the French PHI cohort (FPC), with a predominance of the E157Q mutation. In addition, transmitted viruses may carry NRTI mutations (prevalence of 5.2% in the FPC), affecting the tenofovir/emtricitabine backbone and then weakening elvitegravir, a molecule presenting a lower genetic barrier to resistance than dolutegravir.<sup>11</sup>

Tenofovir/emtricitabine/elvitegravir/cobicistat use requires vigilance when prescribed during PHI and there is a need to check the results of drug resistance testing as soon as possible after ART initiation to exclude the presence of any transmitted or polymorphic drug resistance mutation.<sup>12</sup>

Tenofovir/emtricitabine/elvitegravir/cobicistat is a potent ART, which can reduce the HIV reservoir when initiated swiftly following the PHI. Further data are needed to confirm full diffusion of the drugs in the reservoirs and to compare with other antiretroviral combinations. This combination could represent a therapeutic option in the management of PHI.

## Funding

This study was carried out as part of our routine work.

## Transparency declarations

V. A.-F. declares to have received reimbursement for attending a symposium from Janssen. P. M. declares to have received reimbursement for attending a

symposium from Viiv Healthcare, Gilead, Bristol-Myers Squib, Merck and Janssen. F. B. declares to have received reimbursement for attending a symposium from Viiv Healthcare, Gilead, Bristol-Myers Squib, Merck and Janssen, a fee for speaking and consultancy fee from Viiv Healthcare, Gilead, Bristol-Myers Squib, Merck and Janssen, and funds for research from Gilead and Viiv Healthcare. All other authors: none to declare.

## References

- 1 Laanani M, Ghosn J, Essat A *et al.* Impact of the timing of initiation of anti-retroviral therapy during primary HIV-1 infection on the decay of cell-associated HIV-DNA. *Clin Infect Dis* 2015; **60**: 1715–21.
- 2 *Prise en charge médicale des personnes vivant avec le VIH*. Recommandations du groupe d'experts 2016. <http://cns.sante.fr/actualites/prise-en-charge-du-vih-recommandations-du-groupe-d'experts>.
- 3 Avettand-Fènoël V, Hocqueloux L, Ghosn J *et al.* Total HIV-1 DNA, a marker of viral reservoir dynamics with clinical implications. *Clin Microbiol Rev* 2016; **29**: 859–80.
- 4 Avettand-Fènoël V, Chaix ML, Blanche S *et al.* LTR real-time PCR for HIV-1 DNA quantitation in blood cells for early diagnosis in infants born to seropositive mothers treated in HAART area. *J Med Virol* 2009; **81**: 217–23.
- 5 Fiebig EW, Wright DJ, Rawal BD *et al.* Dynamics of HIV viremia and antibody seroconversion in plasma donors: implications for diagnosis and staging of primary HIV infection. *AIDS* 2003; **17**: 1871–9.
- 6 Hocqueloux L, Avettand-Fènoël V, Jacquot S *et al.* Long-term antiretroviral therapy initiated during primary HIV-1 infection is key to achieving both low HIV reservoirs and normal T cell counts. *J Antimicrob Chemother* 2013; **68**: 1169–78.
- 7 Hey-Cunningham WJ, Murray JM, Natarajan V *et al.* Early antiretroviral therapy with raltegravir generates sustained reductions in HIV reservoirs but not lower T-cell activation levels. *AIDS* 2015; **29**: 911–9.
- 8 Buzon MJ, Martin-Gayo E, Pereyra F *et al.* Long-term antiretroviral treatment initiated at primary HIV-1 infection affects the size, composition, and decay kinetics of the reservoir of HIV-1-infected CD4 T cells. *J Virol* 2014; **88**: 10056–65.
- 9 Nozza S, Poli A, Ripa M *et al.* Efficacy of elvitegravir/cobicistat/emtricitabine/tenofovir disoproxil fumarate as treatment for primary or recent HIV infection. *J Antimicrob Chemother* 2017; **72**: 632–3.
- 10 Lataillade M, Chiarella J, Kozal MJ. Natural polymorphism of the HIV-1 integrase gene and mutations associated with integrase inhibitor resistance. *Antivir Ther* 2007; **12**: 563–70.
- 11 Frange P, Assoumou L, Descamps D *et al.* HIV-1 subtype B-infected MSM may have driven the spread of transmitted resistant strains in France in 2007–12: impact on susceptibility to first-line strategies. *J Antimicrob Chemother* 2015; **70**: 2084–9.
- 12 Ambrosioni J, Nicolás D, Manzardo C *et al.* Integrase strand-transfer inhibitor polymorphic and accessory resistance substitutions in patients with acute/recent HIV infection. *J Antimicrob Chemother* 2017; **72**: 205–9.
